# Supplementary material
Source: MDPI journal article supplement (https://www.mdpi.com/2227-9717/10/11/2330)
Supplement: s1 [file s1]

# Activated carbon aerogel as an electrode with high specific capacitance for capacitive deionization

Wei Wang<sup>1,2</sup>, Kerui Li<sup>1,3</sup>, Ge Song<sup>1</sup>, Minghua Zhou<sup>1\*</sup>, Peng Tan<sup>1</sup>

<sup>1</sup>MOE Key Laboratory of Pollution Processes and Environmental Criteria,

Tianjin Key Laboratory of Environmental Technology for Complex Trans-Media Pollution,

Tianjin Advanced Water Treatment Technology International Joint Research Center,

College of Environmental Science and Engineering, Nankai University, Tianjin 300350, China

<sup>2</sup>Nankai Cangzhou Bohai New Area Green Chemical Research Co., Ltd, Cangzhou 061108, China

<sup>3</sup> China Railway Academy Co., Ltd. Chengdu, 610032, China.

## Text. S1

Pseudo-first-order model:

$$\ln(q_e - q_t) = \ln q_e - k_1 t$$

Pseudo-second order kinetic model:

$$t/q_t = t/q_e + 1/(k_2 q_e^2)$$

where  $q_t$  and  $q_e$  are the adsorption amount at time  $t$  and equilibrium ( $\text{mg}\cdot\text{g}^{-1}$ ), respectively. The  $k_1$  is the rate constant of the pseudo-first-order adsorption ( $\text{min}^{-1}$ ), The calculated  $q_e$  ( $q_{e,\text{cal}}$ ) and  $k_1$  is obtained from the plot  $\ln(q_e - q_t)$  against  $t$ . The  $k_2$  is the rate constant of the pseudo-second-order adsorption ( $\text{g}\cdot\text{mg}^{-1}\cdot\text{min}^{-1}$ ). The calculated  $q_e$  ( $q_{e,\text{cal}}$ ) and  $k_2$  is obtained from the plot  $t/q_t$  against  $t$ .

---

\* Corresponding author. Tel/Fax: +86 022 23501117. E-mail address: zhoumh@nankai.edu.cn (M. Zhou)

The initial adsorption rate ( $h_0$ ) is calculated by the following equation:

$$h_0 = k_2 q_e^2$$

## **Text. S2**

The interaction of ion and sorbent can be evaluated by separation factor ( $R_L$ ).  $R_L$  is a dimensionless constant separation factor, an equilibrium parameter derived from the Langmuir model, and expressed as equation:

$$R_L = 1 / (1 + bC_0)$$

Where  $C_0$  is the initial concentration of ion and  $b$  is the Langmuir constant.

The  $R_L$  values indicate whether the isotherm is favourable ( $0 < R_L < 1$ ), unfavourable ( $R_L > 1$ ), linear ( $R_L = 1$ ) or irreversible ( $R_L = 0$ ).

Fig S1. Schematic diagram of (a) the CDI system and (b) the CDI module.

Fig S2. Relationship between concentration and conductivity of NaCl solution.

Fig S3. SEM images of CA (a) and ACA (b).

Fig S4. N<sub>2</sub> adsorption-desorption isotherms (a) and pore size distribution (b) of CA and ACA.

Fig S5. FTIR (a) and XPS(b) spectra of CA and ACA, C 1s (c) and O 1s (d) high-resolution XPS spectra of CA, C 1s (e) and O 1s (f) high-resolution XPS spectra of ACA.

Fig S6. Contact angles of CA (a) and ACA (b) electrodes.

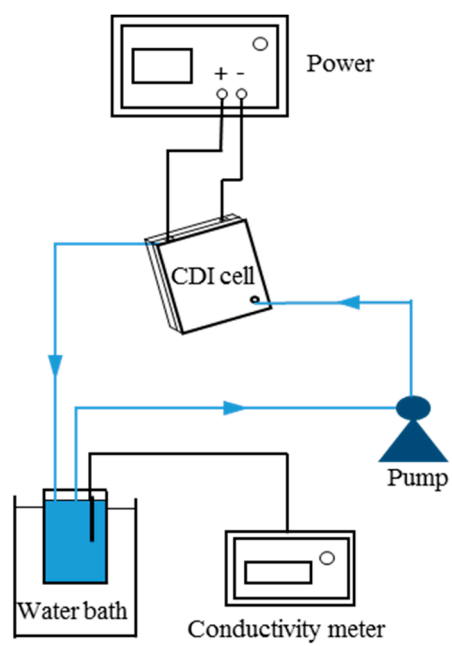

(a)

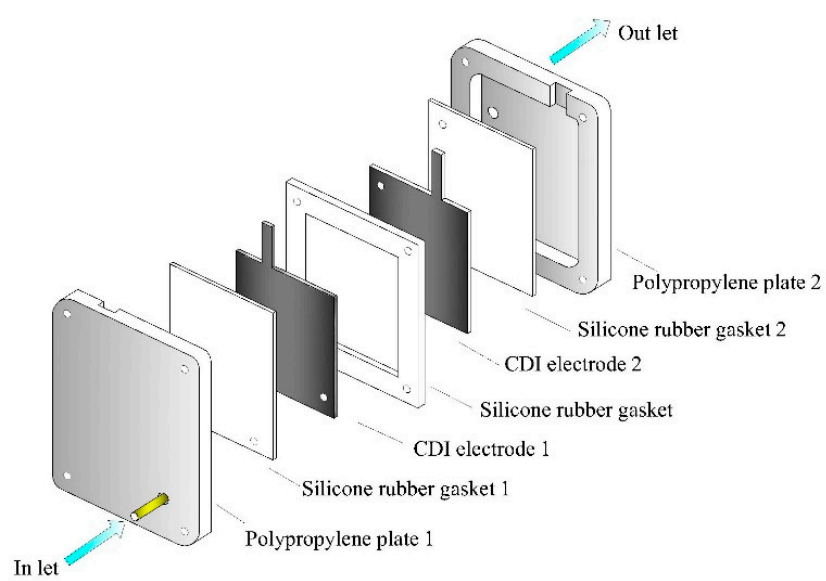

(b)

Fig S1

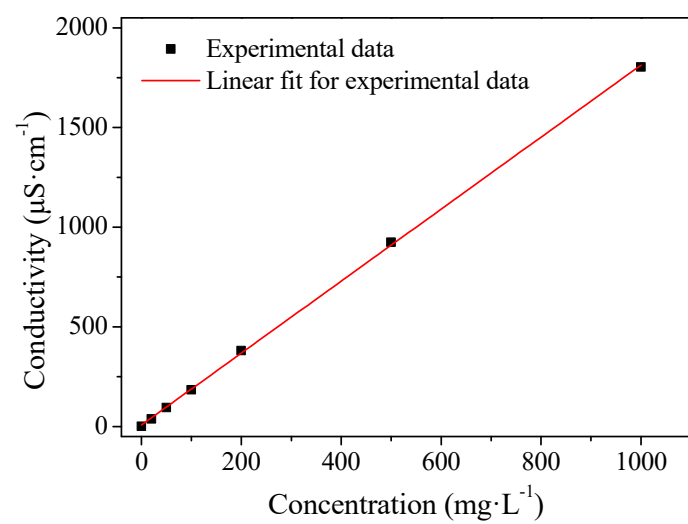

Fig S2

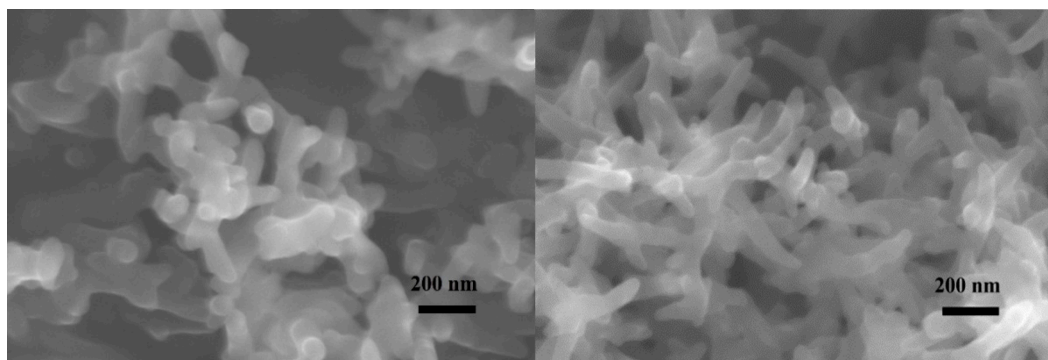

(a)

(b)

Fig. S3

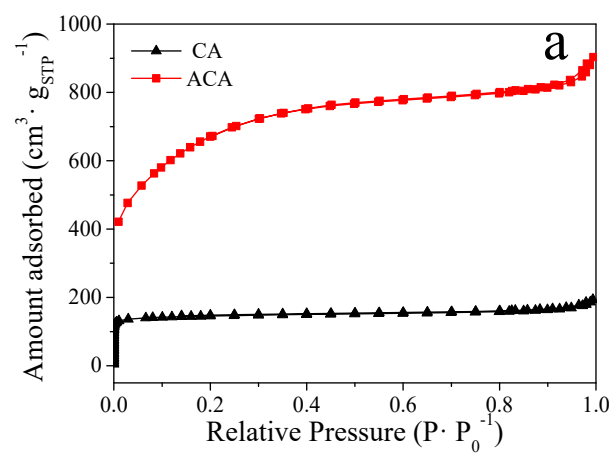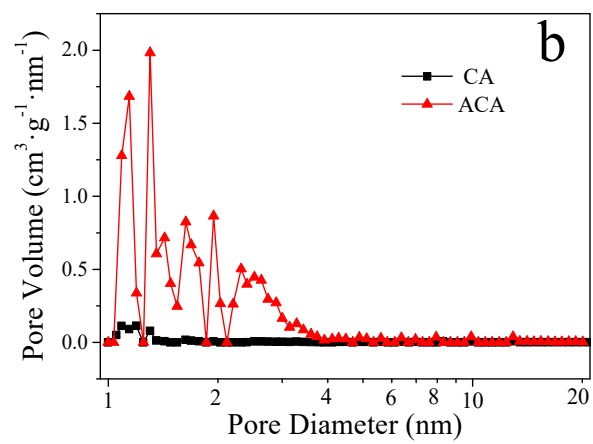

Fig. S4

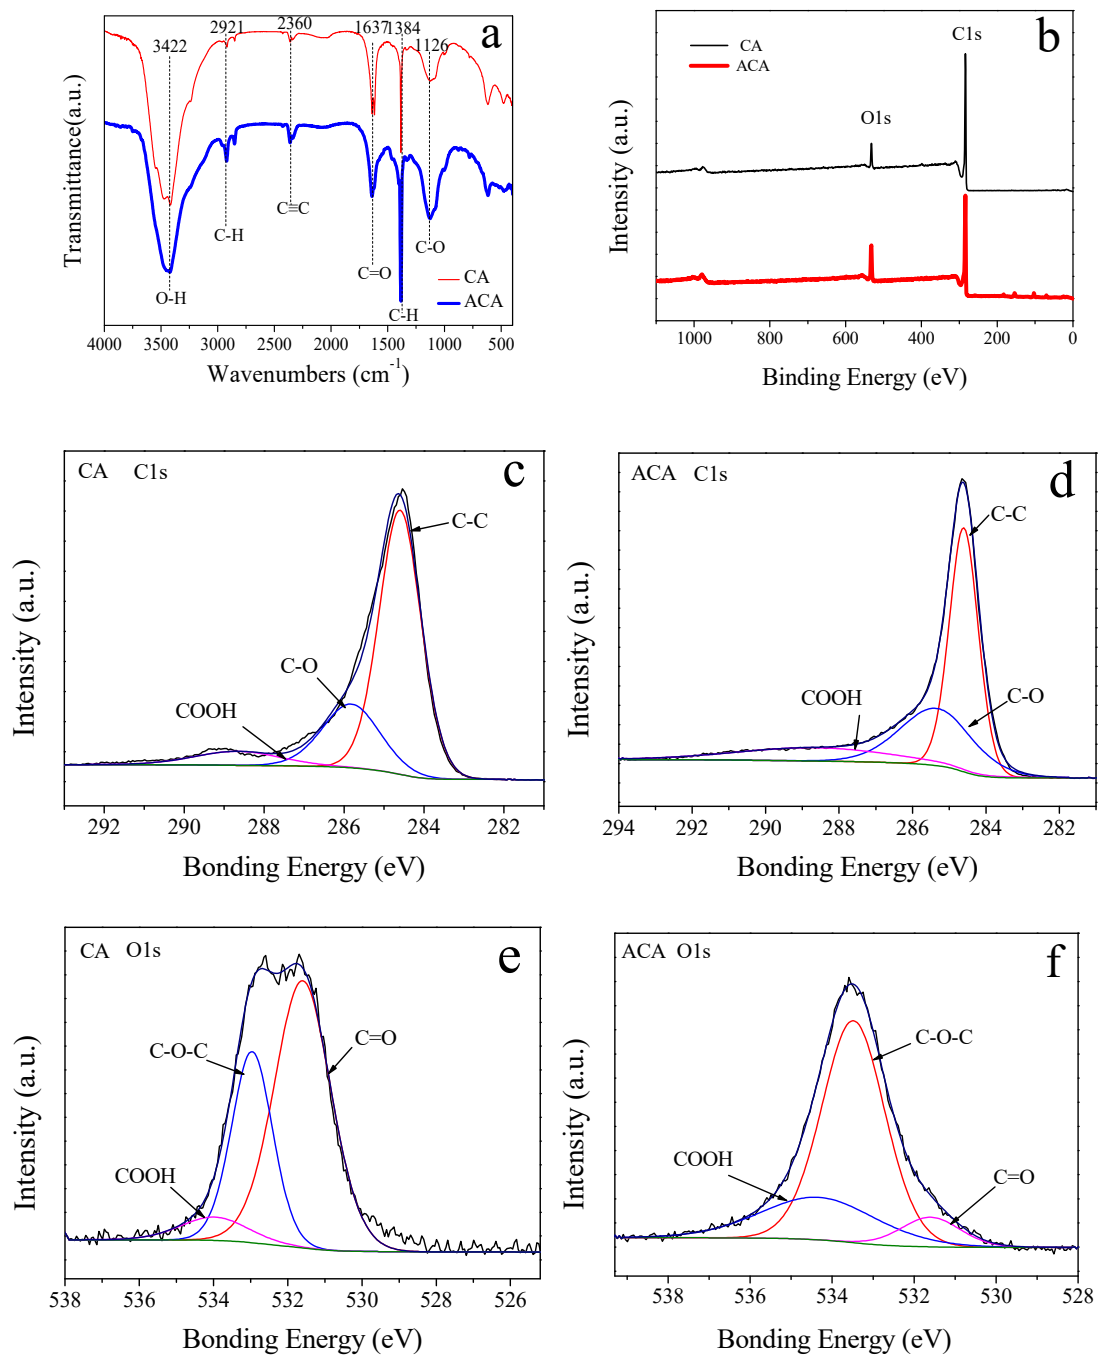

Fig. S5



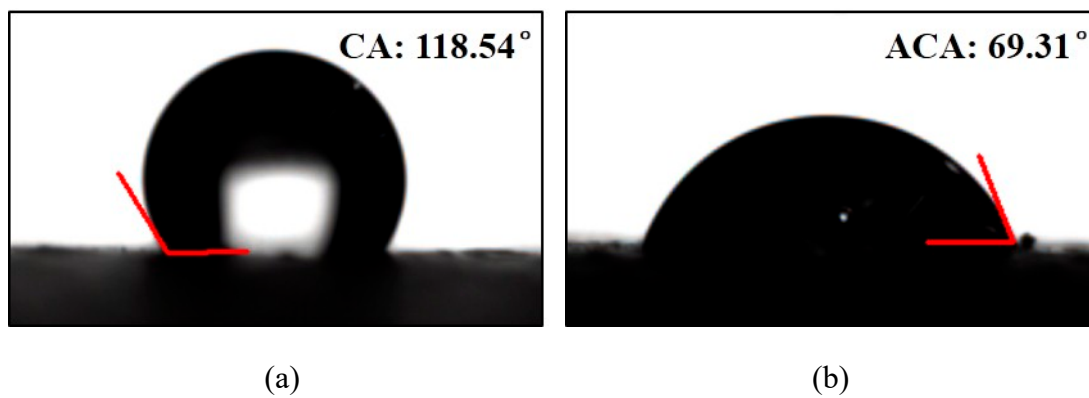

Fig. S6
